# Article

## Genomic instability is an early event driving chromatin reorganization and escape from oncogene-induced senescence

Zampetidis C<sup>1,\*</sup>, Galanos P<sup>2,\*</sup>, Angelopoulou A<sup>1,\*</sup>, Zhu Y<sup>3</sup>, Karamitros T<sup>4</sup>, Polyzou A<sup>1</sup>, Mourkioti I<sup>1</sup>, Lagopati N<sup>1</sup>, Mirzazadeh R<sup>5</sup>, Polyzos A<sup>6</sup>, Garnerone S<sup>5</sup>, Gusmao EG<sup>3</sup>, Sofiadis K<sup>3</sup>, Pefani DE<sup>7</sup>, Demaria M<sup>8</sup>, Crosetto N<sup>5</sup>, Maya-Mendoza A<sup>2</sup>, Evangelou K<sup>1</sup>, Bartek J<sup>2,9,#</sup>, Papantonis A<sup>3, 10,#</sup>, Gorgoulis VG<sup>1,11,12,13,#</sup>

<sup>1</sup>Molecular Carcinogenesis Group, Department of Histology and Embryology, School of Medicine, National Kapodistrian University of Athens, Greece

<sup>2</sup>Genome Integrity Unit, Danish Cancer Society Research Center, Copenhagen, Denmark

<sup>3</sup>Translational Epigenetics Group, Institute of Pathology, University Medical Center Göttingen, Göttingen, Germany

<sup>4</sup>Unit of Bioinformatics and Applied Genomics, Department of Microbiology, Hellenic Pasteur Institute, Athens, Greece

<sup>5</sup>Science for Life Laboratory, Division of Genome Biology, Department of Medical Biochemistry and Biophysics, Karolinska Institute, Stockholm, Sweden

<sup>6</sup>Sanford I. Weill Department of Medicine, Sandra and Edward Meyer Cancer Center, Weill Cornell Medicine, New York, USA

<sup>7</sup>Laboratories of Biology, Medical School, University of Patras, Greece

<sup>8</sup>University of Groningen (RUG), European Research Institute for the Biology of Aging (ERIBA), University Medical Center Groningen (UMCG)

<sup>9</sup>Division of Genome Biology, Department of Medical Biochemistry and Biophysics, Science for Life Laboratory, Karolinska Institute, Stockholm, Sweden

<sup>10</sup>Center for Molecular Medicine, University of Cologne, Cologne, Germany

<sup>11</sup>Biomedical Research Foundation, Academy of Athens, Athens, Greece

<sup>12</sup>Molecular and Clinical Cancer Sciences, Manchester Cancer Research Centre, Manchester Academic Health Sciences Centre, University of Manchester, Manchester, UK

<sup>13</sup>Center for New Biotechnologies and Precision Medicine, Medical School, National and Kapodistrian University of Athens, Athens, Greece

\*These authors contributed equally to this work

#Correspondence to:

Vassilis G. Gorgoulis (Lead Contact); Email: [vgorg@med.uoa.gr](mailto:vgorg@med.uoa.gr), Tel.: +302107462352

Argyris Papantonis; Email: [argyris.papantonis@med.uni-goettingen.de](mailto:argyris.papantonis@med.uni-goettingen.de), Tel.: +495513965734

Jiri Bartek; Email: [jb@cancer.dk](mailto:jb@cancer.dk), Tel.: +4535257357

## SUMMARY

Oncogene-induced senescence (OIS) is an inherent and important tumor suppressor mechanism. However, if not timely removed via immune surveillance, senescent cells will also present a detrimental side. Although this has mostly been attributed to the senescence-associated-secretory-phenotype (SASP) of these cells, we recently proposed that “escape” from the senescent state represents another unfavorable outcome. Here, we exploit genomic and functional data from a prototypical human epithelial cell model carrying an inducible *CDC6* oncogene to identify an early-acquired recurrent chromosomal inversion, which harbors a locus encoding the circadian transcription factor BHLHE40. This inversion alone suffices for BHLHE40 activation upon *CDC6* induction and for driving cell cycle re-entry and malignant transformation. In summary, we now provide strong evidence in support of genomic instability underlying “escape” from oncogene-induced senescence.

**Keywords:** DNA damage, senescence, cancer, DNA replication, *DEC1*, Hi-C, chromatin loop

## HIGHLIGHTS

- Oncogene driven error-prone repair produces early genetic lesions allowing escape from senescence
- Cells escaping oncogene-induced senescence display mutational signatures observed in cancer patients
- A single recurrent inversion harboring a circadian TF gene suffices for bypassing oncogene-induced senescence
- Chromatin loop and compartment remodeling support the “escape” transcriptional program

## INTRODUCTION

According to the DNA damage model for cancer development, activated oncogenes trigger genomic instability that at some point breaches the tumor-suppressing barriers of apoptosis and senescence to promote cancer development [Halazonetis et al., 2008]. This model readily explains how emerging genomic instability in cancer leads, via the accumulation of inactivating mutations at key signaling hubs and regulatory factors, to evasion of apoptosis and “bypass” of senescence [Halazonetis et al., 2008; Negrini et al., 2010; Gorgoulis et al., 2018]. It also provides the grounds for considering senescence as an inherent barrier to tumour development in precancerous stages [Bartkova et al., 2006; Di Micco et al., 2006; Collado et al., 2005; Braig et al., 2005; Michaloglou et al., 2005; Chen et al., 2005]. However, this model does not explain how cells that have entered such a state of irreversible cell cycle arrest become able to breach this barrier and re-initiate proliferation.

Recently, we and others demonstrated how, under certain conditions, a subset of cells in a senescent population do re-enter the cell cycle, thus “escaping” senescence. Such “escapee” cells adopt a more aggressive phenotype that closely mimics cancer development [Galanos et al., 2016; Patel et al., 2016; Milanovic et al., 2018; Komseli et al., 2018; Yu et al., 2018; Gorgoulis et al., 2019]. Nevertheless, the molecular mechanism underlying this “escape” phenomenon has not been deciphered.

Here we hypothesize that, if our cancer development model [Halazonetis et al., 2008] should also pertain to the “escape” phenomenon, then accumulating DNA damage traits during oncogene-induced senescence (OIS) will be selected and should appear in “escape” cells as functionally meaningful genetic defects. To address this, we combine a prototypical OIS cellular system with genomics and functional assays to present the first evidence in support of this hypothesis, while also discussing its clinical significance.

## RESULTS

### *An oncogene-induced senescence model recapitulating cancer evolution*

We recently described a cellular system based on normal human bronchial epithelial cells (HBECS) carrying a *CDC6*-TetON overexpression cassette [Moreno et al., 2016; Komseli et al., 2018]. HBECS are of epithelial origin like most common cancer types, and in their un-induced state (“OFF” in **Figure 1A**), they are free from the mutation burden found in cancer cells [Goodspeed et al., 2016; Stratton et al., 2009]. This permits accurate detection of amassing DNA alterations during *CDC6*-induced senescence (“ON” state in **Figure 1A**).

The replication licensing factor *CDC6* was chosen as the inducible oncogenic stimulus because (i) as a key component of the replication licensing machinery that integrates most mitogenic and oncogenic stimuli, it is frequently deregulated already in the earliest stages of cancer [Karakaidos et al., 2004; Lontos et al., 2007; Sideridou et al., 2011; Petrakis et al., 2016]; (ii) compared to other oncogenes tested, such as *RAS* or *BRAF*, it proved a more powerful inducer of senescence [Patel et al., 2016]; and (iii) its overexpression is linked to poor patient survival across common cancer types (**Figure S1**).

Importantly, this system offers the advantage of prompt and quantitative senescence entry (within <6 days), followed by escape from senescence in a relatively short time period (within ~40 days; “ESC” in **Figure 1A**) [Moreno et al., 2016; Komseli et al., 2018]. These transitions recapitulate the whole evolution course of malignant transformation, and are equally observed in 2D and 3D organotypic cell culture conditions (**Figure S2A-C**). Thus, for

our working hypothesis (see **Introduction**) to be validated, the following need to occur. First, shutting off *CDC6* overexpression in cells that have “escaped” senescence should not result in phenotype reversal, suggesting acquisition of permanent molecular alterations. Second, following *CDC6* induction, DNA double strand breaks (DSBs) should form and, at least a fraction of them, should be repaired in an error-prone manner. Finally, genomic alterations produced in the senescent state should be selected to functionally facilitate “escape”.

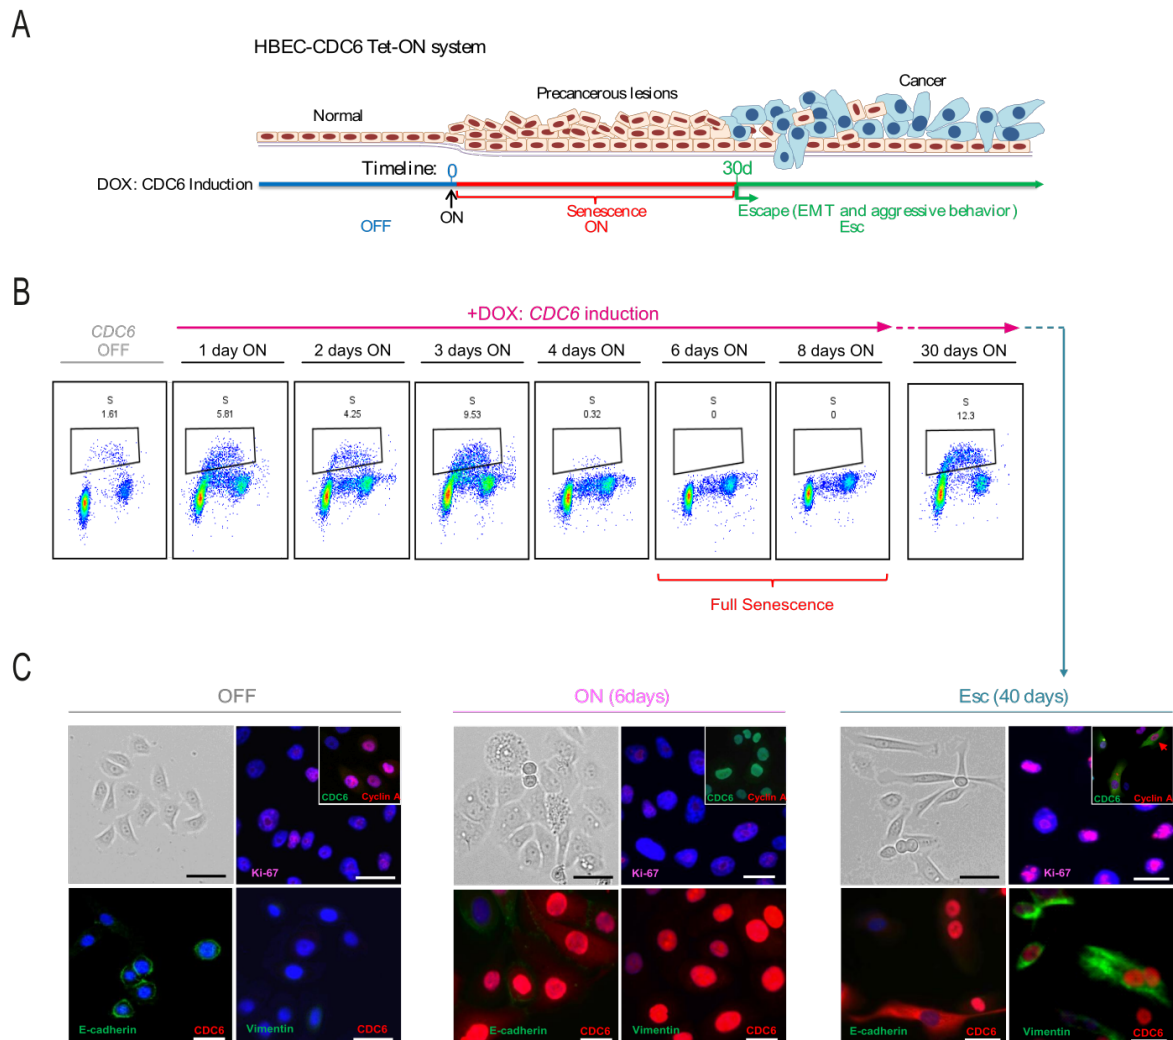

**Figure 1. Escape from oncogene-induced senescence.**

(A) A human bronchial epithelial cell (HBEC) *CDC6*-TetON cellular system recapitulating successive stages of cancer evolution [Komseli et al., 2018].

(B) FACS-based cell cycle analysis of HBECs at different time points following *CDC6* induction demonstrating progressive S-phase reduction until day 4. Bar graphs show mean reduction ( $\pm$ S.D.; n=3). On day 25 a small number of S-phase cells reappears.

(C) Representative phase contrast views and immunodetection of epithelial (E-cadherin) and mesenchymal markers (vimentin) in HBECs showing that escape from *CDC6*-induced senescence (ESC) coincides with epithelial-to-mesenchymal transition.

### ***CDC6 expression is dispensable after EMT-like “escape” from senescence***

To exclude mapping of stochastic alterations, we conducted three independent evolution experiments (**Figure S3A**). In all three, a fraction of cells (~50 colonies/3x10<sup>6</sup> cells) re-entered the cell cycle after a protracted CDC6-induced senescent phase (**Figure 1B** and **Video S1A-B**). These “escape” (ESC) cells adopted epithelial-to-mesenchymal transition (EMT) features (**Figures 1C, S2A-C** and **Video S1A-B**) known to facilitate cancer invasion and metastasis [Nieto et al., 2016; Thiery et al., 2009]. Moreover, conducting a bioinformatic analysis we observed that “escape” cells exhibited a mixed stem cell signature encompassing embryonic, epithelial, mesenchymal-like and MYC-dependent markers [Ritschka et al., 2017; Wong et al., 2008; Kim et al., 2010; Ivanova et al., 2002; Chambers et al., 2007; Milanovic et al., 2018] (**Figure S2D**). Critically, switching off CDC6 overexpression does not result in ESC phenotype reversal, hence the preservation of growth and invasion capacities (**Figure S2E-G**).

### ***DSBs occur early upon senescence entry and are repaired in an error-prone manner***

To determine whether and to which extent double strand breaks (DSBs) occur, we performed BLISS (Breaks Labeling *In-Situ* and Sequencing) [Yan et al., 2017] at different times after CDC6 overexpression. BLISS analysis verified DSB emergence in senescence, with a dramatic increase after 3 days and an almost 50% reduction at the peak of senescence (day 6) suggesting that a repair process took place (**Figure 2A**).

We suspected that, as a replication factor, deregulated CDC6 would alter replication dynamics and induce “replication stress”, thus explaining DSB formation mechanistically. Indeed, we recorded strong aberrations in the form of reduced fork speed and asymmetry following CDC6 induction (**Figure 2B**). In addition, the fraction of cells with increased DNA content (>4N) and DNA damage marker expression, indicative of re-replication, progressively increased (**Figure 2C**). Given that DSBs detected by BLISS were particularly enriched at transcription start sites (TSSs) (**Figure 2D,E**; in agreement with what was observed by Gothe et al., 2019), we postulated that replication-transcription collisions could occur at these positions. In line with this, global inhibition of transcriptional elongation by RNAPII using DRB significantly reduced the levels of DNA damage response (**Figure 2F**).

Concurrently with DSB emergence, we recorded a prompt (within ~24 h) and strong increase in RPA foci (**Figure 3A**), a single-strand DNA binding factor and surrogate marker for replication stress [Gorgoulis et al., 2018]. This finding, in combination with our BLISS results, implies that repair predominantly takes place via homologous recombination during S-phase and before the peak of senescence establishment. However, the levels of key components of the main error-free homologous recombination (HR) pathway, that of the synthesis-dependent-strand-annealing (SDSA) repair, like Rad51, BRCA1 and BRCA2, are reduced (**Figure 3B**). In contrast, Rad52 levels and foci are increased upon CDC6 overexpression (**Figure 3C,D**). Thus, in this “BRCAness” environment with low Rad51 levels, DNA repair will predominantly rely on Rad52 activity, which is central to both break-induced-replication (BIR) and single-strand-annealing (SSA) repair routes. Both BIR and SSA are highly error-prone mechanisms contributing to genomic instability and oncogenic transformation [Galanos et al., 2016, 2018; Sotiriou et al., 2016], and we found them significantly activated in ON cells in a Rad52-dependent manner (**Figure 3E**). At the same time, SDSA processivity was strongly reduced, thus satisfying the requirement in our initial hypothesis for a shift from high to low fidelity DSB repair.



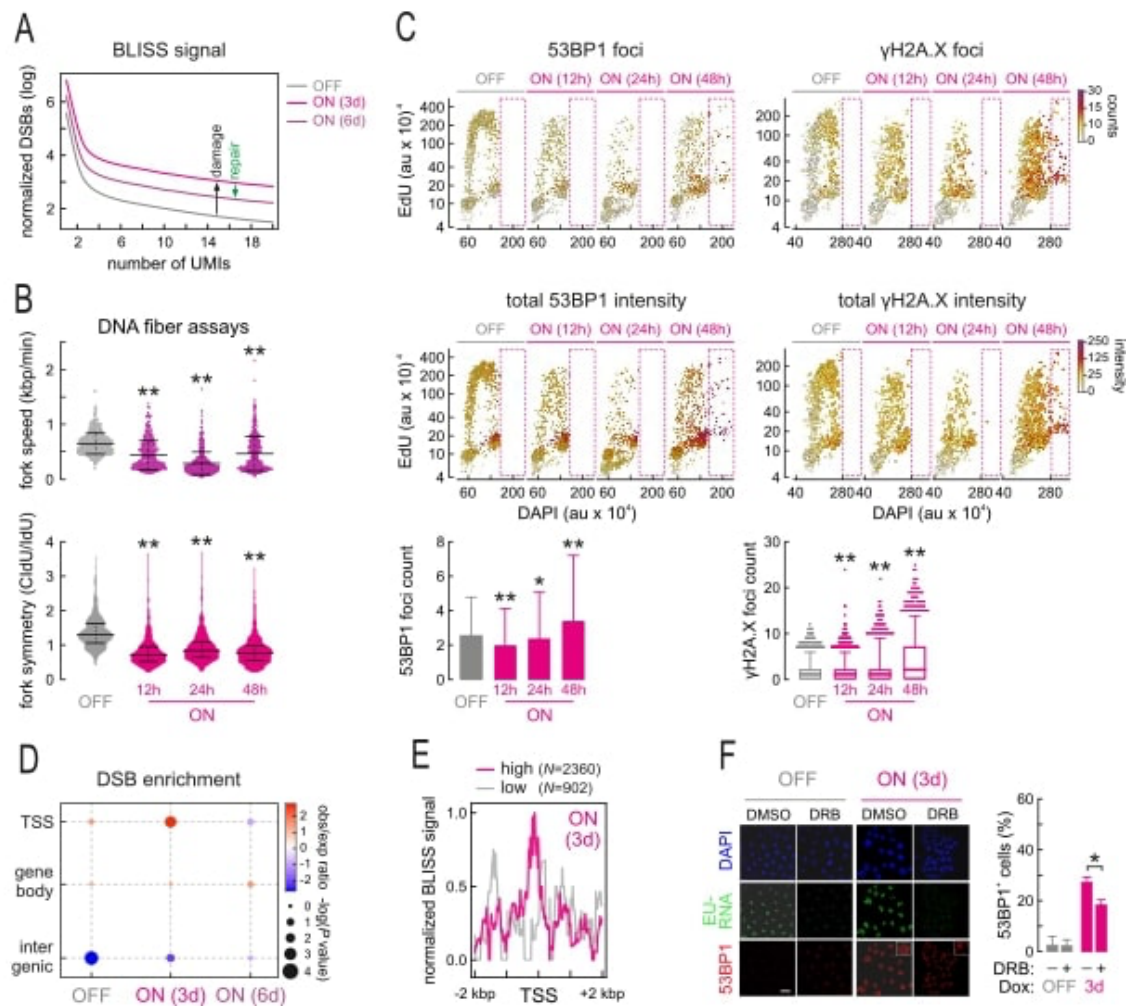

**Figure 2. CDC6 induces DNA double strand breaks (DSBs) and alters replication dynamics.**

(A) BLISS data generated at the time points after *CDC6* activation indicated (UMIs: unique molecular identifiers) show strongest DSB accumulation at 3 days followed by 50% reduction at day 6, indicative of DNA repair.

(B) Violin plots depicting DNA fiber fluorography results show decreased fork rate progression and asymmetry at the time points indicated. \*\*: significantly different to OFF;  $P < 0.01$ , Student's t-test ( $\pm$ S.D.;  $n=3$ ).

(C) Quantitative image based cytometry (QBIC) of HBECS at the time points indicated shows cell cycle distribution of single cells based on cyclin A and DAPI levels (au: arbitrary units). Foci counts (top) and 53BP1 and  $\gamma$ H2AX levels (middle) are indicated by colour-coding. Bar graphs (bottom) show population means ( $\pm$ S.D.) from QBIC measurements. \*\*: significantly different to OFF;  $P < 0.01$ , Student's t-test ( $\pm$ S.D.;  $n=3$ ).

(D) Dot plot showing increased frequency of DSBs at gene TSSs on the basis of BLISS data.

(E) Histogram showing BLISS defined DSBs enrichment at gene TSSs upon *CDC6* induction.

(F) Representative immunofluorescence imaging (left) of EU-labeled nascent RNA and 53BP1 foci in control HBECS (DMSO) or treated with a transcriptional inhibitor (DRB) at the time points indicated. Bar graphs (right) show the percentage ( $\pm$ S.D.;  $n=3$ ) of cells with 53BP1 foci. \*: significantly different to OFF;  $P < 0.05$ , two-tailed unpaired Student's t-test.

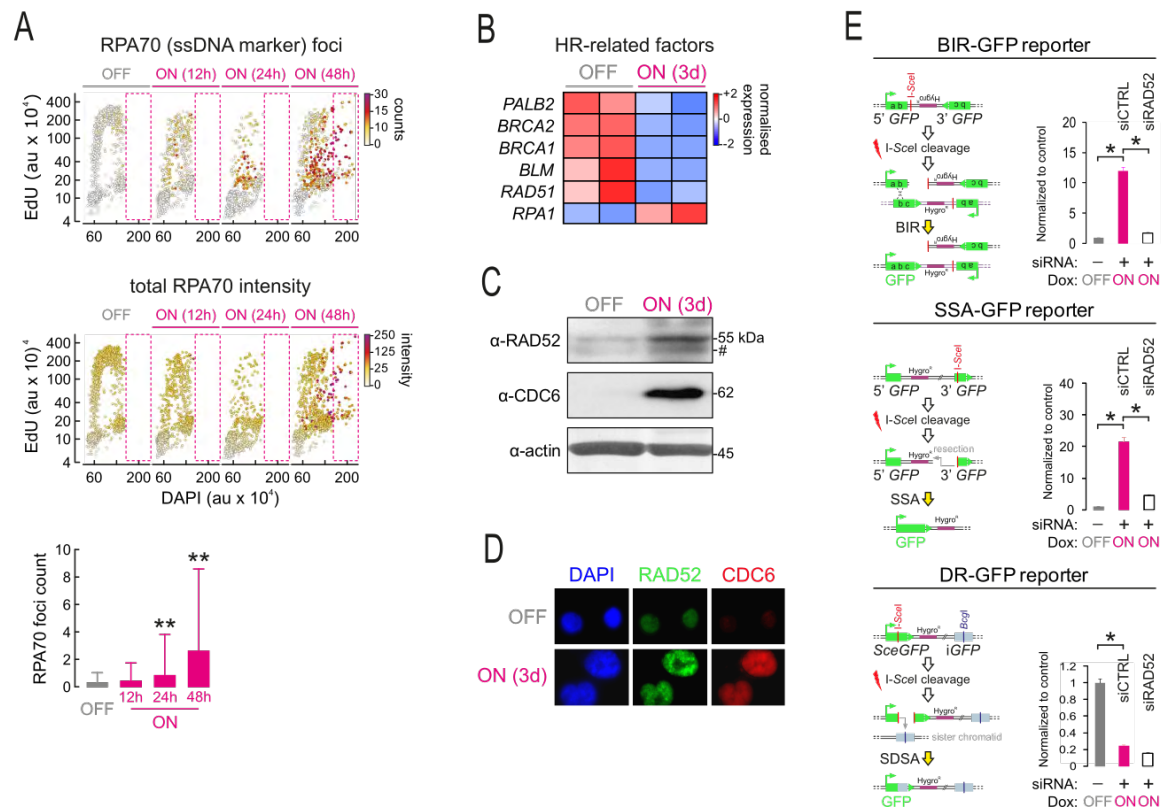

**Figure 3. Sustained *CDC6* expression induces replication stress and error-prone DNA repair.**

(A) Quantitative image based cytometry (QBIC) of HBEs at the time points indicated shows cell cycle distribution of single cells based on cyclin A and DAPI levels (au: arbitrary units). Foci counts (top) and RPA70 levels (middle) are indicated by color-coding. Bar graphs (bottom) show population means (±S.D.) from QBIC measurements. \*\*: significantly different to OFF;  $P < 0.01$ , unpaired two-tailed Student's t-test (±S.D.;  $n=3$ ).

(B) Heatmap showing reduction in the expression levels of the genes involved in error-free homologous recombination (HR) DNA repair upon *CDC6* induction in HBEs (ON).

(C) Western blots showing RAD52 induction upon *CDC6* overexpression in ON cells.

(D) As in panel C, but using immunofluorescence imaging of RAD52 and CDC6.

(E) Reporter assays demonstrating increase (±S.D.;  $n=3$ ) in RAD52-dependent break-induced replication (BIR; top) and in single-strand annealing repair of DSBs (SSA; middle). Error-free repair monitored by a synthesis-dependent strand annealing reporter (SDSA; bottom) is suppressed. \*:  $P < 0.05$ , unpaired two-tailed Student's t-test.

### **“Escape” cells harbor genomic alterations selected early upon senescence entry**

Following a senescent period of ~4 weeks, ESC clones emerged in all three replicates (Figures S2A-C and S3A). To examine whether traits of DNA damage produced early upon senescence entry are selected and maintained in ESC populations, we employed whole-genome sequencing (WGS). Compared to the uninduced cells, WGS uncovered a broad spectrum of single nucleotide variations (SNVs; sequence alterations of <60 bp) and copy number variations (CNVs; sequence alterations of >60 bp) (Figures 4A and S3B).

In more detail, chromosomal distribution of SNVs took a “kategis” form, and we could deduce a mutation signature (Figure S3C,D) resembling the previously reported “signature 15” associated with mismatch defects seen in stomach and lung cancers [Alexandrov et al.,

2013]. Moreover, SNV analysis revealed that our “cancer evolution” model recapitulated two of the most frequently occurring cancer mutations, in *MUC16* and in *NEB* (Figure S4A-C), thus validating its relevance. Both mutants associate with poor outcomes in cancer patients [Chugh et al., 2015; Kufe, 2009; Mazzocchi et al., 2017], with *MUC16* (also known as *CA125*) being an established marker for various cancer types, including lung cancer that is the origin of our cellular system. Although no mutations were found in the *TP53* gene, the most altered gene in cancer (Figure S4A), its negative regulator MDM2 increases in “escape” cells leading to its downregulation (Figure S5A).

Finally, by interrogating the spectrum of recorded CNVs, we made two observations. First, that — as predicted by our model [Halazonetis et al., 2008; Tsantoulis et al., 2008] — genetic alterations were located within common fragile sites (CFSs; Table S1). Second, that 58 out of >650 CNVs per clone were shared by all three replicates (Figure 4A-C). Aligning the breakpoints flanking these CNVs to DSB coordinates obtained via BLISS resulted in a striking overlap for 51 out of 58 of them (Figure 4D).

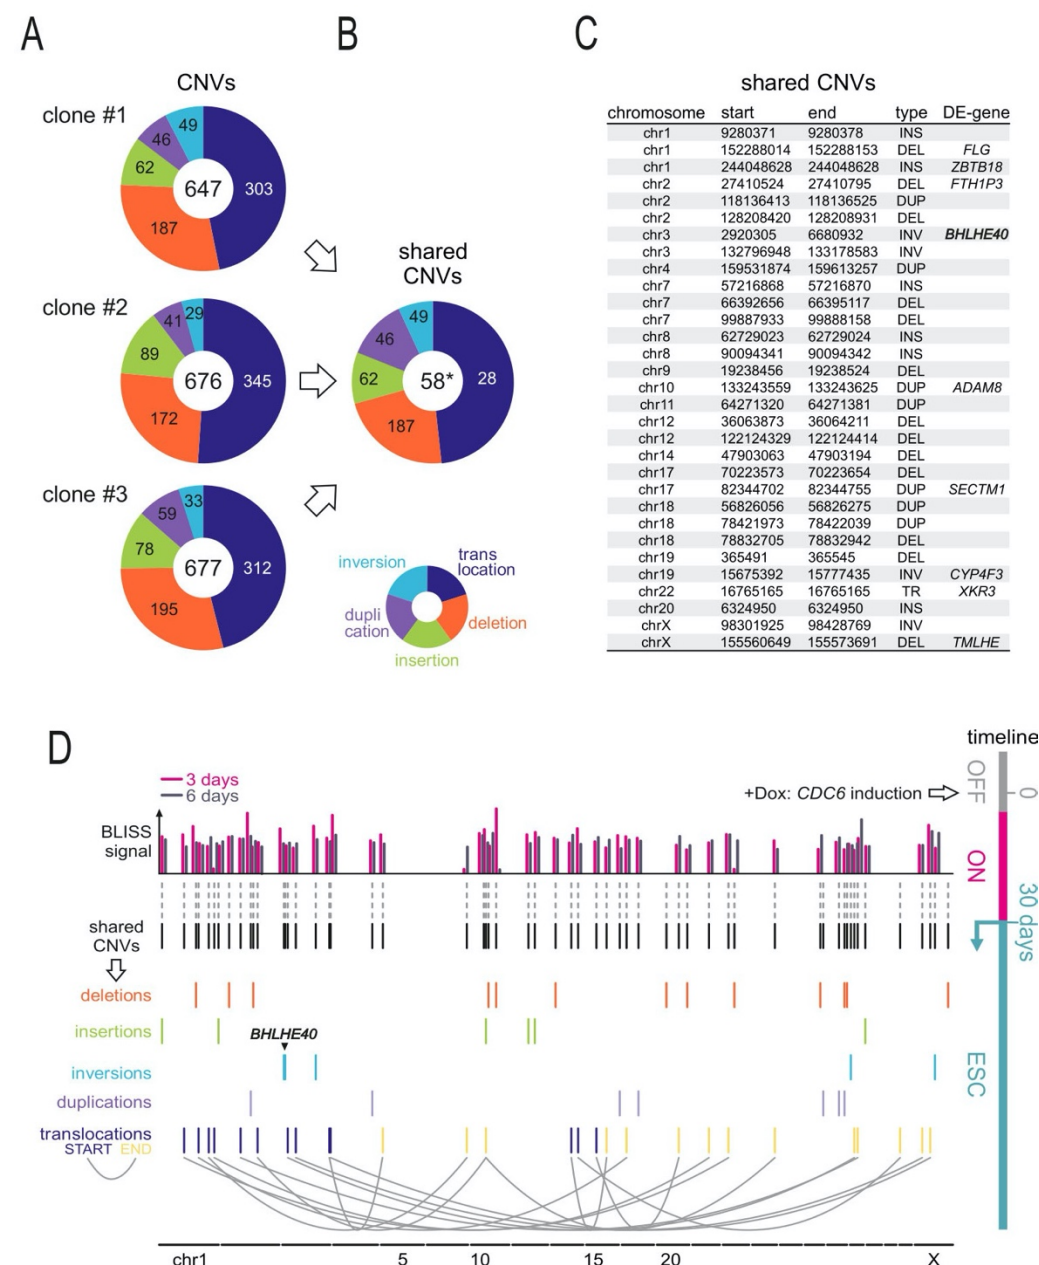



**Figure 4. Escape cells harbor recurrent copy number variations (CNVs) aligning to DSBs.**  
**(A)** Pie charts showing the distribution of CNVs identified in each of three independent replicates into five categories.  
**(B)** Pie charts showing the distribution of the 58 CNVs shared by all the three replicates. \*: significantly more than expected by chance;  $P < 0.0001$ , Super Exact test.  
**(C)** List of the type and location of all shared CNVs from panel B, alongside any differentially-expressed genes they harbour in ESC cells (\*confirmed by RT-qPCR, not in RNA-seq data).  
**(D)** Superimposing DSB coordinates, as defined by BLISS, with the breakpoints of the shared CNVs from panel B shows overlap in 51 out of the 58 cases.

In summary, the cancer specific mutational signature (**Figure S3D**), the recapitulation of the *MUC16* and *NEB* mutations seen in patients (**Figure S4**), and the 58 non-random shared CNVs identified in ESC cells (**Figure 4B,C**) are all indicative of genomic instability being a decisive determinant in the “escape” from oncogene-induced senescence.

#### ***A large chromosomal inversion uncovers a circadian transcription factor as regulator of “escape”***

Given the above data, a fundamental question of our working hypothesis to be addressed is whether genetic alterations obtained early are functionally relevant for the “escape” of the senescence cells that carry them (see **Introduction**). To this end, we noticed a >3.7 Mbp-long heterozygous balanced inversion in the short arm of chr3 in our list of 58 recurring CNVs (**Figures 4B-D, 5A and Table S2**). Naturally occurring inversions are generally less susceptible to further recombination, which suggests that genes within such structural variants are selectively “protected” [Wellenreuther and Bernatchez, 2018]. This HBEC-specific inversion encompasses the *BHLHE40* locus (*basic helix-loop-helix family member 40*, also known as *DEC1*) (**Figure 5A**) encoding a transcription factor that belongs to the CLOCK (*circadian locomotor output cycles kaput*) protein family regulating daily circadian rhythm oscillations [Kato et al., 2014; Sato et al, 2016]. Publicly-available ENCODE ChIP-seq data reveal that *BHLHE40* exhibits strong and ubiquitous binding across the genome and to regulate >15500 human genes [Rouillard et al., 2016], including many cell cycle regulators (**Figure 5B**).

Notably, >68% of genes differentially-expressed upon “escape” from senescence are reported direct *BHLHE40* targets (**Figure 5C and Table S3**). Our transcriptome data show that *BHLHE40* is strongly upregulated in ESC cells (also at the protein level; **Figure S5C**), while *PER1/2*, which encode the key circadian factors periodins [Yamada and Miyamoto, 2005; Wood et al., 2009; Kato et al., 2014; Sato et al, 2016], and *BHLHE41* are suppressed (**Figure 5D**). This suggests a direct role for *BHLHE40* in the promotion of “escape”. In fact, the circadian circuitry governs, amongst other processes, cell cycle progression and its deregulation affects cell cycle checkpoints and can lead to cancer [Hunt and Sassone-Corsi, 2007; Masri et al., 2013]. Looking into genes encoding replication machinery components, we found 38 key ones that are both strongly reactivated in ESC cells and bound by *BHLHE40* (e.g., *BLM*, *GINS1-4*, *MCM2-10*, *PCNA*, *POLE*; **Figure 5B,E**). Among these was also *MDM2*, the main negative regulator of p53 (**Figures 5E and S5A,B**).

To test the functional significance of *BHLHE40* in this model, we silenced its gene in ESC cells using siRNAs. This led to deregulated cell cycle profiles and increased cell death, as shown via FACS (from  $1.89 \pm 0.8\%$  cells to  $21.25 \pm 0.3\%$ ; **Figure 5F**) and caspase-3 staining

(from  $0.5 \pm 0.8\%$  cells to  $59.9 \pm 6.8\%$ ; **Figure 5G**). Notably, *BHLHE40* silencing also led to upregulation of *PER1* (**Figure 5H**), known to sensitize cells to apoptosis [Gery et al., 2006; Hunt and Sassone-Corsi, 2007]. Together, these results show that *BHLHE40* upregulation is necessary for the maintenance of the “escape” phenotype. The significance of *BHLHE40* is also applies to clinical outcomes, as its overexpression is associated with adverse impact on survival in various malignancies, including lung cancer (**Figure S6**).

Apart from the *BHLHE40* inversion, which appears to be central in the “escape” phenomenon, a reciprocal translocation involving chromosomes 9 and 22 typically identified in chronic myelogenous leukemia (CML) was also shared by all three ESC populations (**Figure S7**). Finally, all genes laying in the remaining shared CNVs have been associated with the senescence process (for details see **Table S2B**).

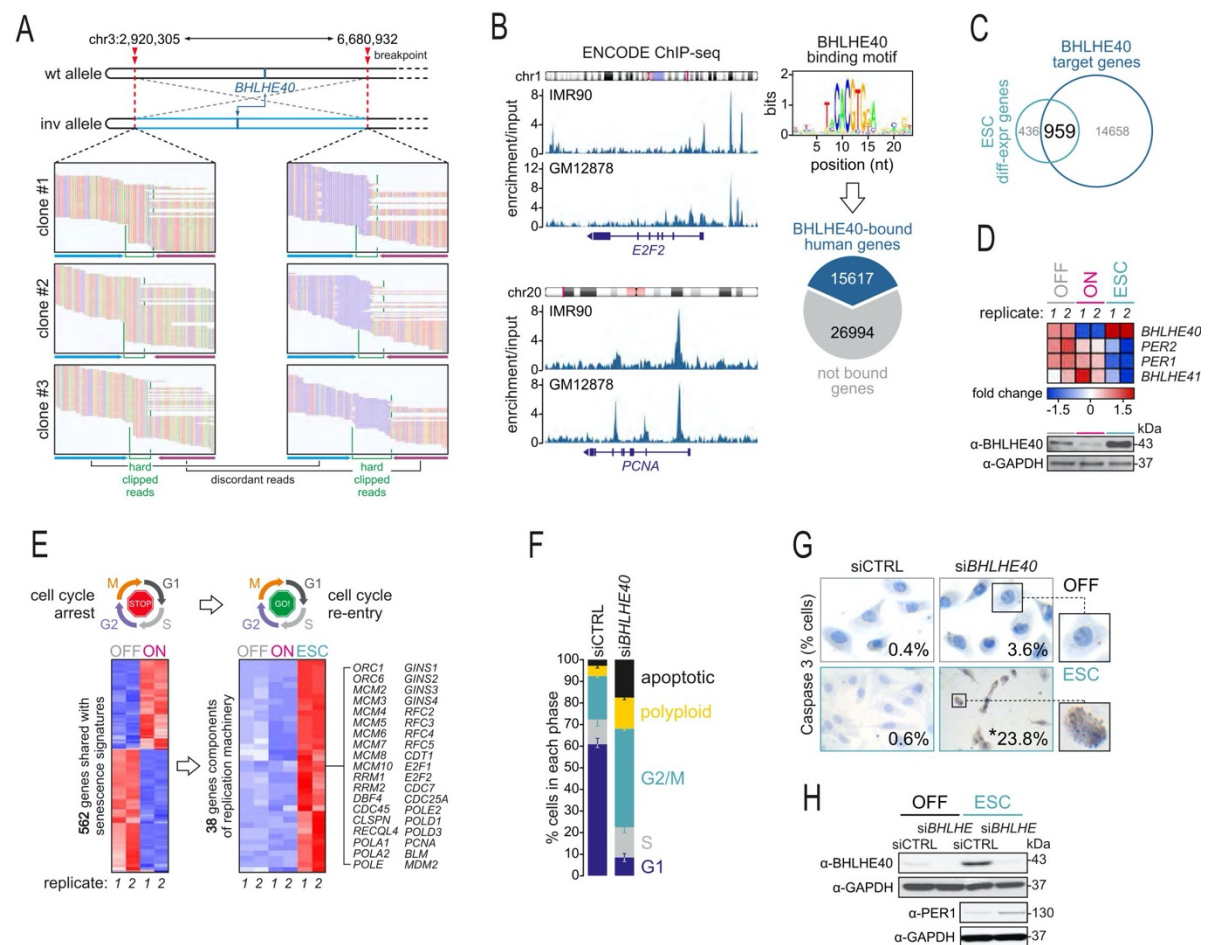

**Figure 5. The chr3 inversion harbors *BHLHE40* that is essential for “escape” phenotype maintenance.**

(A) WGS data around the chr3 inversion breakpoints in ESC cells. Hard clipped (green lines) and discordantly mapped reads (blue/purple arrows) are indicated for all three replicates.

(B) Representative genome browser views (left) of *BHLHE40* ENCODE ChIP-seq data from IMR90 and GM12878 cells in the *E2F2* and *PCNA* loci. This data was used to infer the *BHLHE40* binding motif logo, and to assign 36.7% of all human genes as its direct targets [Perte et al., 2018].

(C) Venn diagram showing 68.8% of all genes differentially-expressed in ESC cells also being *BHLHE40* targets according to ChIP-seq data.

(D) Heatmap of RNA-seq data shows *BHLHE40*, but not other circadian genes like *PER1/2*, being selectively upregulated in ESC cells.

(E) Heatmap (*left*) showing that 25.3% of the 2220 differentially-expressed in ON cells are shared with reported senescence signatures [Hernandez-Segura et al., 2017]. Of these, 38 encode replication machinery components (*right*) and are strongly induced in ESC cells.

(F) FACS-based cell cycle profiling of control (siCTRL) and *BHLHE40*-knockdown (siBHLHE40) cells showing significantly altered cell cycle progression and increased cell death, denoted with a red arrow ( $\pm$ S.D.;  $n=3$ ). \*significantly more than in control:  $P<0.001$ , Fisher's exact test.

(G) Representative images of control (siCTRL) and *BHLHE40*-knockdown cells (siBHLHE40) immunostained for Caspase-3. Inset numbers indicate the percentage of positive cells (from a minimum of 100 cells counted in each condition). \*:  $P<0.01$ , Fisher's exact test.

(H) Western blots showing reciprocal changes in *BHLHE40* and *PER1* levels upon *BHLHE40*-knockdown in ESC cells, thought to drive apoptosis [Hunt and Sassone-Corsi, 2007].

### **A CRISPR-generated inversion in chr3 suffices for senescence bypass**

Subsequently, we tested whether genetic alterations, obtained early upon senescence entry and maintained in ESC cells, are functionally relevant to this transition. In other words, does the inversion in chr3 facilitate “escape” by promoting *BHLHE40* reinduction in response to oncogenic stimuli? To answer this, we first examined *BHLHE40* protein levels along a time course from OFF to ESC cells. Baseline levels in OFF cells are reduced upon *CDC6* induction, but markedly increased in the “escape” state (Figure S5C). Interestingly, *BHLHE40* suppression was partially alleviated by day 6 (Figure S5C). This coincides with the window of error-prone DSB repair (Figure 2A) and, thus, with the presumed acquisition time of the chr3 inversion.

Next, we used CRISPR-Cas9 editing in HBECS to target sequences within 72 bp (from 2,920,305) and 50 bp (from 6,680,932) of the inversion breakpoints discovered via WGS. We generated two independent clones carrying this 3.7-Mbp heterozygous inversion (Figures 6A and S8A). “Inverted” cells demonstrated a loss of epithelial features with accentuated spindle morphology, low E-cadherin and emergent Vimentin expression (Figure 6B), reminiscent of the metastable state characterizing cells undergoing trans-differentiation [Nieto et al, 2016]. Strikingly, and in accordance to our hypothesis, upon *CDC6* induction the clones carrying this inversion never ceased to proliferate nor did they acquire morphological features of senescence, supporting the notion that they bypass the senescent barrier (Figures 6C,D and S8B,C). Notably, at the initial phases of *CDC6* induction, the low S-phase cell percentages observed can be attributed to the particularly energy-demanding state of this metastable phenotype [Nieto et al., 2016] and/or to DDR activation (Figure S8D,E). This is, nevertheless, not adequate for triggering senescence in this specific “genetic terrain” (Figure 6B-D). Soon after this “slow growth” phase (Figures 6C and S8C), inverted cells do progressively increase their growth rate and invasion capacity (Figure 6E,F). Critically, both inverted clones overexpressed *BHLHE40* upon *CDC6* induction (Figures 6G,H and S8F) and this overexpression drives gene expression changes that favor senescence suppression and cell cycle reentry (Figure 6I). In summary, a single inversion in one of the alleles harboring *BHLHE40* suffices for driving constitutive expression of this circadian transcription factor in response to oncogenic overexpression and “escape” from senescence.

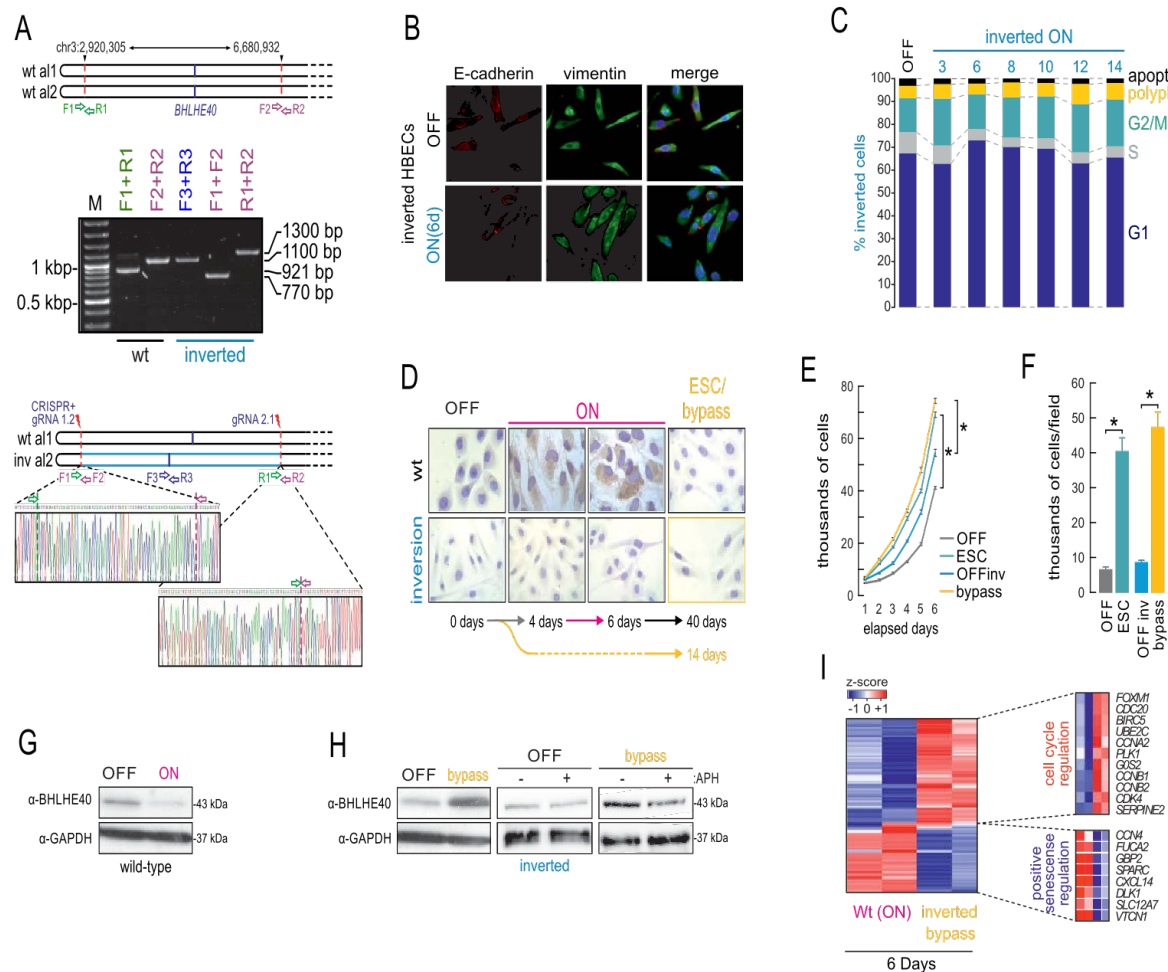



### **Genomic instability-mediated chromatin refolding underlies *BHLHE40* induction and “escape” from senescence**

It is now understood that changes in three-dimensional (3D) chromosome architecture, like those caused by inversions, may mechanistically explain disease manifestation, including cancer [Ibrahim and Mundlos, 2020]. To test whether this also can also explain *BHLHE40* upregulation, we investigated 3D reorganization in the extended *BHLHE40* locus. We used our “inverted” HBEs to generate high-resolution Hi-C maps from OFF and “senescence-bypass” cells (Table S4). Genome-wide comparison of this data revealed that “bypass” cells exhibit an increase in sub-Mbp interactions (Figure 7A), accompanied by changes in the identity of compartments. Approximately 10% of A- or B-compartments switch to B or A, respectively, and this switching explains a considerable fraction (almost 50%) of the gene expression changes that underlie senescence bypass (Figure 7B). However, only marginal changes to “topologically-associating domain” positions (TADs; Beagan and Philips-Cremins, 2020) were found (Figure 7C). These effects are, for the most part, the converse of what was observed for cells transitioning into oncogene-induced or “deep” senescence [Chandra et al., 2015; Criscione et al., 2016].

Looking specifically into the 3D organization of chromatin around the inversion region on chr3, we can make three key observations. First, that *BHLHE40* resides in one of the two centrally-located TADs of this extended locus, the long-range contacts of which do not change between OFF and “bypass” cells (Figure 7D). Thus, we can rule out the “classical” scenario of *BHLHE40* re-expression due to ectopic contacts with enhancers in adjacent TADs [Ibrahim and Mundlos, 2020]. Second, we recorded the emergence of new loops in this 4-Mbp region, which contribute to the enhanced insulation of the two central TADs from one another (Figure 7D, circles). Strikingly, a survey of this same 4-Mbp region encompassing *BHLHE40* in publicly-available Hi-C data showed that these two centrally-located TADs appear fused in normal tissue (Figure S9A), but well-insulated in cancer cells (Figure S9B), thus reflecting our OFF and “bypass” data, respectively. Third, we found that strong loop emergence coincided with the strengthening and broadening of the small A-compartment harboring *BHLHE40*, which is in line with its more potent activation Figure 7D, bottom).

Given these effects in the *BHLHE40* domain, we speculated that changes to CTCF loops genome-wide might explain the changes underlying senescence bypass. Indeed, subtracting OFF from “bypass” Hi-C data revealed new long-range contacts emerging (Figure 7E). Across all chromosomes ~3500 new loops arise, while >2000 specific to OFF cells are lost (Figure 7F). In line with our subtracted maps, bypass-specific loops are on average larger than OFF-specific ones (Figure 7G). Interestingly, and exactly as in the case of the *BHLHE40* domain, these bypass-specific loops arise at positions of existing insulation that become markedly strengthened. At the same time, insulation at the anchors of OFF-specific loops show little fluctuation (Figure 7H). Together, this type of changes suggests rewiring of regulatory gene-enhancer interactions. To cite two characteristic examples, we see the emergence of bypass-specific loops in loci suppressed upon senescence bypass. In both cases, these loops trap the two genes, *RRM2* and *NCAPG* (involved in replication and mitosis, respectively), in between consecutive insulated domains to mediate their downregulation (Figure S10A,B; Table S5). In contrast, *LAP3* finds itself within an emerging bypass-specific loop and is induced (Figure S10B).



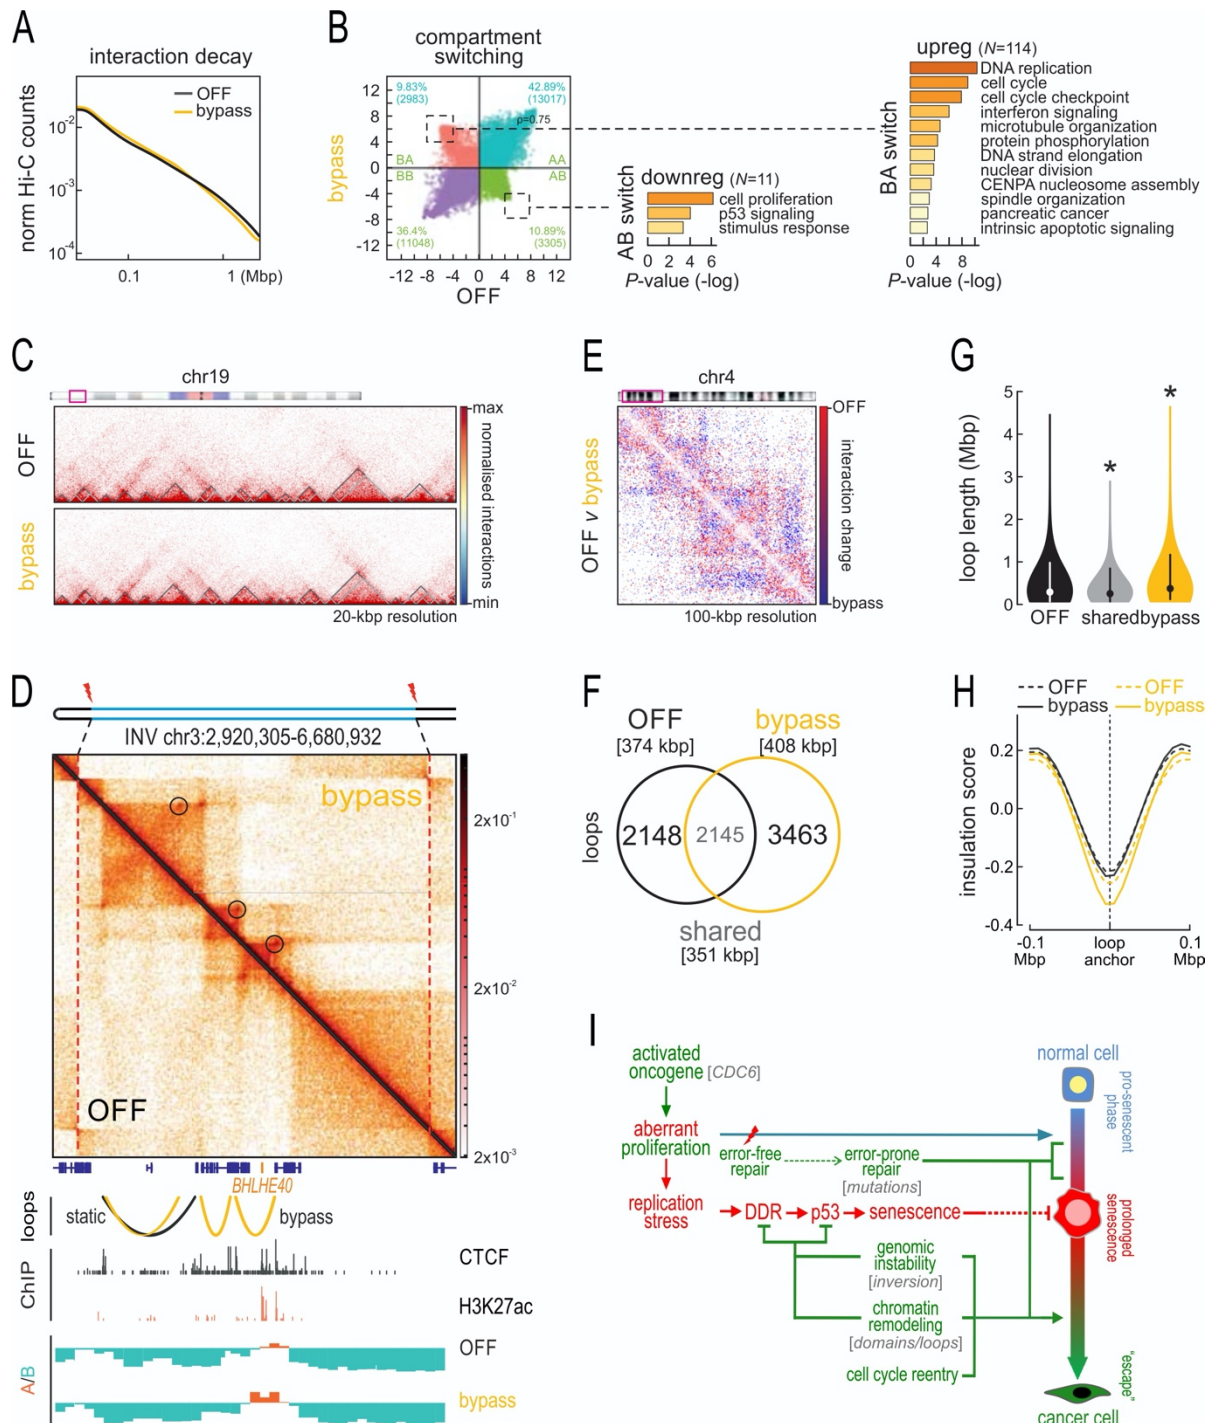

**Figure 7. Analysis of spatial chromatin interactions in “inverted” OFF and bypass cells.**

(A) Line plot showing mean interaction strength decay (Hi-C counts) in relation to increasing separation of interacting fragments in OFF (black) and bypass “inverted” cells (yellow).

(B) Changes in A/B-compartments in bypass versus OFF Hi-C data. Strong B-to-A and A-to-B switching (dotted squares) are indicated, and the GO terms associated with differentially-expressed genes embedded in each switched domain.

(C) Exemplary Hi-C heatmaps from OFF and bypass cells showing negligible changes in TAD positions for a subregion on chr19.

(D) Composite Hi-C heatmap depicting interactions from OFF (bottom) and bypass “inverted” cells (top) in the region harboring *BHLHE40* on chr3. The data is aligned to CTCF and H3K27ac

ChIP-seq data from normal OFF HBECs, as well as to A/B-compartment positions from OFF and bypass cells. CTCF-anchored loops emerging upon senescence bypass are denoted on the Hi-C map (*circles*) and aligned below (*yellow arches*).

(E) Subtracted Hi-C heatmap showing changes in interactions upon transition from OFF to bypass “inverted” cells for a subregion on chr4.

(F) Venn diagram showing the number of loops unique to OFF and bypass “inverted” cells or shared. Median loop lengths (*square brackets*) are indicated.

(G) Violin plots showing distribution of lengths for the loops from panel H. \*: significantly different to OFF; *P*-value <0.05, Wilcoxon-Mann-Whitney test.

(H) Line plots showing mean insulation of chromatin interactions in the 200 kbp around loop anchors unique to OFF (*black*) or bypass “inverted” loops (*yellow*) using Hi-C data from OFF (*dotted lines*) and bypass cells (*solid lines*).

(I) Update on the DNA damage model for cancer development [Halazonetis et al., 2008]. Cells respond to oncogenic stimuli by eliciting senescence as an anti-tumor barrier. The high DNA damage (DSBs) burden amassing during senescence engages error-prone repair mechanisms. Consequently, genetic aberrations accumulate with concurrent chromatin remodeling that provide a “pool” of genomic defects, from which those that facilitate “escape” from senescence, cell cycle re-entry and aggressive features are selected and maintained.

Furthermore, given that replication origins in mammals are not defined by specific sequences but rather by structural chromatin context [Antequera, 2004; Cvetic and Walter, 2005] we reasoned that changes in chromatin segment orientation could additionally reorganize the replication process, and in turn affect gene transcription [Lin et al., 2003; Chen et al., 2019; Fisher and Mechali 2003]. The dependence of transcription on replication (S-phase dependence) has been demonstrated in various developmental procedures [Fisher and Mechali 2003]. This, combined with the fact that replication origins can be activated due to replication stress [Courtot et al., 2018], like that induced by CDC6 overexpression, prompted us to investigate if BHLHE40 up-regulation is linked to replication. Indeed, treating bypass “inverted” cells with aphidicolin markedly reduced the protein levels of BHLHE40, which was not the case for OFF cells (Figure 6H). Likewise, wild-type ESC, but not OFF, cells responded the exact same way to aphidicolin by suppressing BHLHE40 levels (Figure S8G). Together, such 3D reorganization events can explain gene expression changes leading to senescence bypass.

## DISCUSSION

Entry into senescence is a generalized physiological stress response and as such it is also triggered by oncogene activation to serve as a tumor suppressing mechanism [Gorgoulis et al., 2019]. Still, as with any form of senescence, if the resulting cells are not removed from their niche in a timely manner, an undesirable pro-tumorigenic facet can arise [Rodier and Campisi, 2011; Muñoz-Espín and Serrano, 2014; Gorgoulis et al., 2018; 2019]. This adverse effect has been attributed to the SASP, the secretory cocktail that senescence cells release into their surroundings to trigger chronic inflammation [Gorgoulis et al., 2019]. However, recent reports by us and other proposed that some senescent cells can “escape” this state of oncogene-induced senescence to initiate malignancy [Galanos et al., 2016; 2018; Komseli et

al., 2018; Milanovic et al., 2018], but the molecular mechanisms underlying this “escape” still remain obscure.

Here, we present the first mechanistic evidence of how DNA lesions acquired early upon entry into oncogene-induced senescence can drive this phenomenon of “escape”. We exploit normal human bronchial epithelial cell driven to senescence by overexpressing the *CDC6* oncogene. From the populations of these senescent cells, mesenchymal-like, aggressively proliferating cells eventually emerge within ~40 days. Thus, we essentially mimic “cancer evolution” to find that (i) forced *CDC6* expression induces DSBs genome-wide as early as 3 days post-senescence entry; (ii) these DSBs are predominantly repaired in an error-prone manner; (iii) poorly repaired lesions are actively selected during this “cancer evolution” time course and appear essential for the establishment and/or maintenance of the “escape” clones (**Figure 7I**).

Large genomic cancer studies have shown that the path to malignancy is not uniquely defined, but rather needs to fulfill particular characteristics that allow for the aggressive and unhindered proliferation capacity cancer cells exhibit [Gorgoulis et al., 2018]. We believe that this also applies to the “escape” from senescence. Indeed, our independent ESC clones display recurrent structural and sequence variants that can linked to their phenotype. For example, the precise recapitulation of frequent cancer mutations in *MUC16* and *NEB*, or the resemblance of the ESC SNV signature to that previously discovered in actual patient tumors [Alexandrov et al., 2013]. Another prerequisite for HBEC “escape”, and for most malignant transformation [Aylon and Oren, 2011], is inactivation of the p53 response [Halazonetis et al., 2008]. This also occurs in our model, not via *CDC6*-dependent mutation of the *TP53* locus itself, but rather indirectly via MDM2 upregulation to shut down p53. This course of events is not confined to the bronchial epithelium, but can be recapitulated in human pancreatic duct epithelial cells (HPDECs) that carry an inducible *CDC6* construct and in which p53 function is inactivated via HPV16-E6 transduction [Ouyang et al., 2000]. This is a relevant cell system because *CDC6* overexpression and senescence are frequently detected in precancerous pancreatic lesions [Myrianthopoulos et al., 2019]. As predicted, following *CDC6* induction, HPDECs follow a trajectory that bypasses senescence (**Figure S11**).

Nevertheless, a prominent and recurrent feature in our ESC clones is the 3.7-Mbp heterozygous inversion on chr3. While essentially all types of structural aberrations have been functionally linked to cancer development [Stratton et al., 2009; Danieli and Papantonis, 2020], inversions appear to confer specific properties as regards their selection. Their predominant heterozygous nature allows for their lower recombination potential and, thus, their selective maintenance so that the genes they harbor function in an advantageous “enhanced” mode [Puig et al., 2015; Wellenreuther and Bernatchez, 2018]. Accordingly, the *BHLHE40* gene harbored in our 3.7-Mbp inversion encodes a circadian transcription factor known for controlling a large number of human genes and a variety of processes, including the cell cycle [Hunt and Sassone-Corsi, 2007; Wood et al., 2009; Kato et al., 2014; Sato et al., 2016]. In our system, control of >70% of differentially-regulated genes in “escape” cells can be attributed to BHLHE40. Despite the fact that its expression has been linked to senescence [Collado et al., 2006; Qian et al., 2008], dependence of this “escape” phenomenon on BHLHE40 can be explained by the following sequence of molecular events. Soon after, within <3 days, erroneous repair establishes an inverted locus where this circadian gene is now responsive to *CDC6* overexpression and markedly upregulated. A major player in this

appears to be CTCF and its ability to direct loop formation along chromosomes [Rada-Iglesias et al., 2018; Braccioli and de Wit, 2019]. Remodeling of the *BHLHE40* topological domain via the emergence of *de novo* loops coincides with its activation. The resulting abundance of this potent transcription factor is reminiscent of an oncogenic stimulus that can only exert its pro-tumorigenic potential once relieved of the senescence barrier. Such a mode-of-action would then explain contentious reports showing that BHLHE40 triggers senescence or supports cell proliferation, EMT, tumor formation and poor patient survival [Sato et al., 2016; Yamada and Miyamoto, 2005; Qian et al., 2008]. It can also explain those “escape”-relevant gene expression changes that correlate with loop rewiring, in line with the proposed role for BHLHE40 in regulating CTCF binding genome-wide [Hu et al., 2020].

Taken together, our work suggests that it is in the early phase of oncogene-induced senescence that the “genetic seeds” of the forthcoming malignant transformation are planted in chromosomes (Figure 7K). Whether “escape” will always be the inevitable destiny of a subset of cells or whether there are cell-autonomous or non-cell-autonomous factors that can dictate this remains to be elucidated. Nonetheless, these findings can have far-reaching clinical implications: the majority of clinically-used chemotherapeutic agents target proliferating cancer cells, while senescent cells represent a dormant compartment tolerant to traditional therapy. Hence, targeting senescent cells can prove of major clinical importance. In light of the expanding field of senotherapeutics [Zhu et al., 2015; Childs et al., 2015; Gorgoulis et al., 2019; Myrianthopoulos et al., 2019], such consideration will be critical in order to prioritize therapeutic choices.

## SUPPLEMENTAL INFORMATION

This manuscript is accompanied by Supplemental Information containing Methods, Figures S1-S11, Tables S1-7, and Video S1.

## DATA AVAILABILITY

All the Hi-C data generated in this study are available via the NCBI Gene Expression Omnibus repository under accession number GSE163371 (reviewer access token: *kfmxxuaxnklzqd*). All the other data are available via the Sequence Read Archive under bioproject PRJNA685322.

## ACKNOWLEDGEMENTS

We would like to thank Dr. Claus Storgaard Sørensen for constructive discussions and Konstantinos Belogiannis and Dr. Athanassios Kotsinas for their input while preparing the manuscript. We also thank Dr. Ioannis S. Pateras, Dr. Teresa Frisan, and Dr. Anastasios Papanastasiou for valuable technical support to this work. V.G.G. is financially supported by: the European Union’s Horizon 2020 research and innovation program under the Marie Skłodowska-Curie grants agreement no. 722729 (SYNTRAIN); the National Public Investment Program of the Ministry of Development and Investment / General Secretariat for Research and Technology, in the framework of the Flagship Initiative to address SARS-CoV-2 (2020ΣΕ01300001); the Welfare Foundation for Social & Cultural Sciences (KIKPE), Athens, Greece; H. Pappas donation; grants no. 775 and 3782 from the Hellenic Foundation for Research and Innovation (HFRI); and NKUA-SARG grant 70/3/8916. A.P. is supported by the Deutsche Forschungsgemeinschaft via the Clinical Research Unit KFO5002 project grant (CO 1568/2-1) and the Priority Program SPP2202 (grant PA 2456/11-1). Y.Z. is also supported by



the IMPRS “Molecular Biology” program, part of the Göttingen Graduate Center for Neurosciences, Biophysics and Molecular Biosciences (GGNB). P.G. is supported by the Danish Cancer Society (R167-A11068) and the Lundbeck Foundation (R322-2019-2577). JB and his team were supported by the Danish Cancer Society (R204-A12617-B153), the Novo Nordisk Foundation (#16854), the Danish National Research Foundation (project CARD, DNRF 125), the Swedish Research Council (VR-MH 2014-46602-117891-30) and the Cancerfonden (#170176).

## AUTHOR CONTRIBUTIONS

C.Z., P.G., A.A., I.M., N.L., K.E., A.M.M.: cell culture and manipulations, immunoblots, FACS, immunofluorescence analysis, immunocytochemistry, SenTraGor staining, combing assays, PCR, invasion assays, QBIC analysis, 3D cell culture; A.A., Y.Z., E.G.G., K.S.: ChIP-seq, Hi-C, CRISPR/Cas9 editing, RNA-seq; D.E.P.: EU assay; R.M., S.G., N.C.: BLISS; T.K., Y.Z., E.G.G., T.K., A.Po., Ai.Po.: bioinformatic analyses; T.K.: survival analyses; P.G., M.D., K.E., J.B., A.P., V.G.G.: data analysis and interpretation, manuscript preparation; J.B., A.P., V.G.G.: experimental design, supervision and project funding, manuscript writing with input for all co-authors.

## REFERENCES

- Abdennur N., Mirny L.A. (2020) Cooler: scalable storage for Hi-C data and other genomically labeled arrays. *Bioinformatics* 36, 311-316.
- Alexandrov L.B., Nik-Zainal S., Wedge D.C., Aparicio S.A., Behjati S., Biankin A.V., et al. (2013) Signatures of mutational processes in human cancer. *Nature* 500, 415-421.
- Anders S., Huber W. (2010) Differential expression analysis for sequence count data. *Genome Biology* 11, R106.
- Anders S., Pyl P.T., Huber W. (2015) HTSeq-a Python framework to work with high-throughput sequencing data. *Bioinformatics* 31, 166-169.
- Antequera F. (2004) Genomic specification and epigenetic regulation of eukaryotic DNA replication origins. *EMBO J.* 23, 4365-4370.
- Aylon Y., Oren M. (2011) New plays in the p53 theater. *Curr. Opin. Genet. Dev.* 21, 86-92.
- Bartkova J., Rezaei N., Liontos M., Karakaidos P., Kletsas D., Issaeva N., et al. (2006) Oncogene-induced senescence is part of the tumorigenesis barrier imposed by DNA damage checkpoints. *Nature* 444, 633-637.
- Beagan J.A., Phillips-Cremens J.E. (2020). On the existence and functionality of topologically associating domains. *Nat. Genet.* 52, 8-16.
- Bianchi V., Pontis E., Reichard P. (1986) Changes of deoxyribonucleoside triphosphate pools induced by hydroxyurea and their relation to DNA synthesis. *J. Biol. Chem.* 261, 16037-16042.
- Braccioli L., de Wit E. (2019) CTCF: a Swiss-army knife for genome organization and transcription regulation. *Essays Biochem.* 63, 157-165.
- Braig M., Lee S., Loddenkemper C., Rudolph C., Peters A.H., Schlegelberger B., et al. (2005) Oncogene-induced senescence as an initial barrier in lymphoma development. *Nature* 436, 660-665.
- Chambers S.M., Boles N.C., Lin K.-Y.K., Tierney M.P., Bowman T.V., Bradfute S.B., et al. (2007) Hematopoietic fingerprints: an expression database of stem cells and their progeny. *Cell Stem Cell* 1, 578-591.



- 601 Chandra T., Ewels P.A., Schoenfelder S., Furlan-Magaril M., Wingett S.W., Kirschner K., et al.  
602 (2015) Global reorganization of the nuclear landscape in senescent cells. *Cell Rep.* 10, 471-  
603 483.
- 604 Chen Y.H., Keegan S., Kahli M., Tonzi P., Fenyő D., Huang T.T., et al. (2019) Transcription shapes  
605 DNA replication initiation and termination in human cells. *Nat. Struct. Mol. Biol.* 26, 67-77.
- 606 Chen X., Schulz-Trieglaff O., Shaw R., Barnes B., Schlesinger F., Källberg M., et al. (2016) Manta:  
607 rapid detection of structural variants and indels for germline and cancer sequencing  
608 applications. *Bioinformatics* 32, 1220-1222.
- 609 Chen Z., Trotman L.C., Shaffer D., Lin H.K., Dotan Z.A., Niki M., et al. (2005) Crucial role of p53-  
610 dependent cellular senescence in suppression of Pten-deficient tumorigenesis. *Nature* 436,  
611 725-730.
- 612 Childs B.G., Durik M., Baker D.J., van Deursen J.M. (2015). Cellular senescence in aging and age-  
613 related disease: from mechanisms to therapy. *Nat. Med.* 21, 1424-1435.
- 614 Chugh S., Gnanapragassam V.S., Jain M., Rachagani S., Ponnusamy M.P., Batra S.K. (2015)  
615 Pathobiological implications of mucin glycans in cancer: Sweet poison and novel targets.  
616 *Biochim. Biophys. Acta* 1856, 211-225.
- 617 Collado M., Gil J., Efeyan A., Guerra C., Schuhmacher A.J., Barradas M., et al. (2005) Tumour  
618 biology: senescence in premalignant tumours. *Nature* 436, 642.
- 619 Courtot L., Hoffmann J.S., Bergoglio V. (2018) The protective role of dormant origins in response  
620 to replicative stress. *Int. J. Mol. Sci.* 19, 3569.
- 621 Criscione S.W., Cecco M., Siranosian B., Zhang Y., Kreiling J., Sedivy J., et al. (2016)  
622 Reorganization of chromosome architecture in replicative cellular senescence. *Sci. Adv.* 32,  
623 751-761.
- 624 Cvetcic C., Walter J.C. (2005) Eukaryotic origins of DNA replication: could you please be more  
625 specific? *Semin. Cell. Dev. Biol.* 16, 343-353.
- 626 Danecek P., Auton A., Abecasis G., Albers C.A., Banks E., DePristo M.A., et al. (2011) The variant  
627 call format of VCF tools. *Bioinformatics* 27, 2156-2158.
- 628 Danieli A., Papantonis A. (2020) Spatial genome architecture and the emergence of malignancy,  
629 *Hum. Mol. Genet.* 29, R197-204.
- 630 Dereli-Oz A., Versini G., Halazonetis T.D. (2011) Studies of genomic copy number changes in  
631 human cancers reveal signatures of DNA replication stress. *Mol. Oncol.* 5, 308-314.
- 632 Despagne A., Schöpflin R., Franke M., Ali S., Jerković I., Paliou C., et al. (2019) Functional dissection  
633 of the Sox9-Kcnj2 locus identifies nonessential and instructive roles of TAD architecture. *Nat.*  
634 *Genet.* 51, 1263-1271.
- 635 Di Micco R., Fumagalli M., Cicalese A., Piccinin S., Gasparini P., Luise C., et al. (2006) Oncogene-  
636 induced senescence is a DNA damage response triggered by DNA hyper-replication. *Nature*  
637 444, 638-642.
- 638 Dobin A., Davis C.A., Schlesinger F., Drenkow J., Zaleski C., Jha S., et al. (2013) STAR: ultrafast  
639 universal RNA-seq aligner. *Bioinformatics* 29, 15-21.
- 640 Evangelou K., Lougiakis N., Rizou S.V., Kotsinas A., Kletsas D., Munoz-Espin D., et al. (2017)  
641 Robust, universal biomarker assay to detect senescent cells in biological specimens. *Aging Cell*  
642 16, 192-197.
- 643 Fisher D., Mechali M. (2003) Vertebrate HoxB Gene Expression Requires DNA Replication. *EMBO*  
644 *J.* 22, 3737-3748.
- 645 Ford E., Nikopoulou C., Kokkalis A., Thanos D. (2014) A method for generating highly multiplexed  
646 ChIP-seq libraries. *BMC Res. Notes* 7, 312.

647 Galanos P., Vougas K., Walter D., Polyzos A., Maya-Mendoza A., Haagensen E.J., et al. (2016)  
648 Chronic p53-independent p21 expression causes genomic instability by deregulating  
649 replication licensing. *Nat. Cell Biol.* **18**, 777-789.

650 Galanos P., Pappas G., Polyzos A., Kotsinas A., Svolaki I., Giakoumakis N.N., et al. (2018)  
651 Mutational signatures reveal the role of RAD52 in p53-independent p21-driven genomic  
652 instability. *Genome Biol.* **19**, 37.

653 Georgakilas A.G., Tsantoulis P., Kotsinas A., Michalopoulos I., Townsend P., Gorgoulis V.G. (2014)  
654 Are common fragile sites merely structural domains or highly organized “functional” units  
655 susceptible to oncogenic stress? *Cell. Mol. Life Sci.* **71**, 4519-4544.

656 Gery S., Komatsu N., Baldjyan L., Yu A., Koo D., Koeffler H.P. (2006) The circadian gene *per1* plays  
657 an important role in cell growth and DNA damage control in human cancer cells. *Mol. Cell* **22**,  
658 375-382.

659 Gothe H.J., Bouwman B.A.M., Gusmao E.G., Piccinno R., Petrosino G., Sayols S., et al. (2019)  
660 Spatial chromosome folding and active transcription drive DNA fragility and formation of  
661 oncogenic MLL translocations. *Mol. Cell* **75**, 267-283.

662 Goodspeed A., Heiser L.M., Gray J.W., Costello J.C. (2016) Tumor-Derived Cell Lines as Molecular  
663 Models of Cancer Pharmacogenomics. *Mol. Cancer Res.* **14**, 3-13.

664 Gorgoulis V., Adams P.D., Alimonti A., Bennett D.C., Bischof O., Bishop C., et al. (2019) Cellular  
665 senescence: defining a path forward. *Cell* **179**, 813-827.

666 Gorgoulis V.G., Halazonetis T.D. (2010) Oncogene-induced senescence: the bright and the dark  
667 side of the response. *Curr. Opin. Cell Biol.* **22**, 816-827.

668 Gorgoulis V.G., Pefani D.E., Pateras I.S., Trougakos I.P. (2018) Integrating the DNA damage and  
669 protein stress responses during cancer development and treatment. *J. Pathol.* **246**, 12-40.

670 Halazonetis T.D., Gorgoulis V.G., Bartek J. (2008) An oncogene-induced DNA damage model for  
671 cancer development. *Science* **319**, 1352-1355.

672 Hazan I., Hoffman T.G., Aqeilan R.I. (2016) Tumor suppressor genes within common fragile sites  
673 are active players in the DNA damage response. *PLoS Genet.* **12**, e1006436.

674 Hernandez-Segura A., de Jong T.V., Melov S., Guryev V., Campisi J., Demaria M. (2017)  
675 Unmasking transcriptional heterogeneity in senescent cells. *Curr. Biol.* **27**, 2652-2660.

676 Hu G., Dong X., Gong S., Song Y., Hutchins A.P., Yao H. (2020) Systematic screening of CTCF  
677 binding partners identifies that BHLHE40 regulates CTCF genome-wide distribution and long-  
678 range chromatin interactions. *Nucleic Acids Res.* **48**, 9606-9620.

679 Hunt T., Sassone-Corsi P. (2007) Riding tandem: circadian clocks and the cell cycle. *Cell* **129**, 461-  
680 464.

681 Ibrahim D.M., Mundlos S. (2020) Three-dimensional chromatin in disease: What holds us  
682 together and what drives us apart? *Curr. Opin. Cell Biol.* **64**, 1-9.

683 Ivanova N.B., Dimos J.T., Schaniel C., Hackney J.A., Moore K.A., Lemischka I.R. (2002) A stem cell  
684 molecular signature. *Science* **298**, 601-604.

685 Karakaidos P., Taraviras S., Vassiliou L.V., Zacharatos P., Kastrinakis N., Kougiou D., et al. (2004)  
686 Overexpression of the replication licensing regulators hCdt1 and hCdc6 characterizes a subset  
687 of non-small-cell lung carcinomas. *Am. J. Pathol.* **165**, 1351-1365.

688 Kato Y., Kawamoto T., Fujimoto K., Noshiro M. (2014) DEC1/STRA13/SHARP2 and DEC2/SHARP1  
689 coordinate physiological processes, including circadian rhythms in response to environmental  
690 stimuli. *Curr. Top. Dev. Biol.* **110**, 339-372.

691 Kerpedjiev, P., Abdennur, N., Lekschas, F. et al. (2018) HiGlass: web-based visual exploration and  
692 analysis of genome interaction maps. *Genome Biol.* **19**, 125.

- Kim J., Woo A.J., Chu J., Snow J.W., Fujiwara Y., Kim C.G., et al. (2010) A Myc network accounts for similarities between embryonic stem and cancer cell transcription programs. *Cell* 143, 313-324.
- Komseli E.S., Pateras I.S., Krejsgaard T., Stawiski K., Rizou S.V., Polyzos A., et al. (2018) A prototypical non-malignant epithelial model to study genome dynamics and concurrently monitor micro-RNAs and proteins *in situ* during oncogene-induced senescence. *BMC Genomics* 19, 37.
- Krefting J., Andrade-Navarro M.A., Ibn-Salem J. (2018) Evolutionary stability of topologically associating domains is associated with conserved gene regulation. *BMC Biol.* 16, 87.
- Kufe D.W. (2009) Mucins in cancer: function, prognosis and therapy. *Nat Rev Cancer* 9, 874-85
- Kundu L.R., Kumata Y., Kakusho N., Watanabe S., Furukohri A., Waga S., et al. (2010) *Nucleic Acids Res.* 38, 5409-5418.
- Langmead B., Salzberg SL. (2012) Fast gapped-read alignment with Bowtie 2. *Nat. Methods* 9, 357-359.
- Li H., Handsaker B., Wysoker A., Fennell T., Ruan J., Homer N., et al. (2009) 1000 genome project data processing subgroup. The sequence alignment/map format and SAMtools. *Bioinformatics* 25, 2078-2079.
- Li H., Durbin R. (2010) Fast and accurate long-read alignment with Burrows-Wheeler transform. *Bioinformatics* 26, 589-595.
- Lin C.M., Fu H., Martinovsky M., Bouhassira E., Aladjem M.I. (2003) Dynamic alterations of replication timing in mammalian cells. *Curr Biol.* 13, 1019-1028.
- Liontos M., Koutsami M., Sideridou M., Evangelou K., Kletsas D., Levy B., et al. (2007) Deregulated overexpression of hCdt1 and hCdc6 promotes malignant behavior. *Cancer Res.* 67, 10899-10909.
- Macheret M., Halazonetis T.D. (2018) Intragenic origins due to short G1 phases underlie oncogene-induced DNA replication stress. *Nature* 555, 112-116.
- Masri S., Cervantes M., Sassone-Corsi P. (2013) The circadian clock and cell cycle: interconnected biological circuits. *Curr. Opin. Cell Biol.* 25, 730-734.
- Maya-Mendoza A., Moudry P., Merchut-Maya J.M., Lee M., Strauss R., Bartek J. (2018) High speed of fork progression induces DNA replication stress and genomic instability. *Nature* 559, 279-284.
- Mazzocchi G., Castellana S., Carella M., Palumbo O., Tiberio C., Fusilli C., et al. (2017) A primary tumor gene expression signature identifies a crucial role played by tumor stroma myofibroblasts in lymph node involvement in oral squamous cell carcinoma. *Oncotarget* 8, 104913-104927.
- Michaloglou C., Vredeveld L.C., Soengas M.S., Denoyelle C., Kuilman T., van der Horst C.M., et al. (2005) BRAFE600-associated senescence-like cell cycle arrest of human naevi. *Nature* 436, 720-724.
- Milanovic M., Fan D.N.Y., Belenki D., Dabritz J.H.M., Zhao Z., Yu Y, et al. (2018) Senescence associated reprogramming promotes cancer stemness. *Nature* 553, 96-100.
- Moreno A., Carrington JT., Albergante L., Al Mamun M., Haagensen EJ, Komseli ES., et al. (2016) Unreplicated DNA remaining from unperturbed S phases passes through mitosis for resolution in daughter cells. *Proc. Natl. Acad. Sci. U.S.A.* 113: 5757-64.
- Munoz-Espin D., Serrano M. (2014) Cellular senescence: from physiology to pathology. *Nat. Rev. Mol. Cell. Biol.* 15, 482-96.

738 Myrianthopoulos V., Evangelou K., Vasileiou P.V.S., Cooks T., Vassilakopoulos T.P., Pangalis G.A.,  
739 et al. (2019) Senescence and senotherapeutics: a new field in cancer therapy. *Pharmacol.*  
740 *Ther.* **193**, 31-49.

741 Nagy A., Lánckzy A., Menyhárt O., Györfy B. (2018) Validation of miRNA prognostic power in  
742 hepatocellular carcinoma using expression data of independent datasets. *Sci. Rep.* **8**, 9227.

743 Negrini S., Gorgoulis V.G., Halazonetis T.D. (2010) Genomic instability—an evolving hallmark of  
744 cancer. *Nat. Rev. Mol. Cell. Biol.* **11**, 220-28.

745 Nieto M.A., Huang R.Y., Jackson R.A., Thiery J.P. (2016) EMT: 2016. *Cell* **166**, 21-45.

746 Ochs F., Somyajit K., Altmeyer M., Rask M.B., Lukas J., Lukas C. (2016) 53BP1 fosters fidelity of  
747 homology-directed DNA repair. *Nat. Struct. Mol. Biol.* **23**, 714-721.

748 Ong C.T., Corces V.G. (2014) CTCF: an architectural protein bridging genome topology and  
749 function. *Nat. Rev. Genet.* **15**, 234-246.

750 Ouyang H., Mou L.J., Luk C., Liu N., Karaskova J., Squire J., et al. (2000) Immortal human  
751 pancreatic duct epithelial cell lines with near normal genotype and phenotype. *Am. J. Pathol.*  
752 **157**, 1623-1631.

753 Patel P.L., Suram A., Mirani N., Bischof O., Herbig U. (2016) Derepression of hTERT gene  
754 expression promotes escape from oncogene-induced cellular senescence. *Proc. Natl. Acad.*  
755 *Sci. U.S.A.* **113**, E5024-5033.

756 Pertea M., Shumate A., Pertea G., Varabyou A., Breitwieser F.P., Chang Y.C., et al. (2018) CHES: a  
757 new human gene catalog curated from thousands of large-scale RNA sequencing experiments  
758 reveals extensive transcriptional noise. *Genome Biol.* **19**, 208.

759 Petrakis T.G., Komseli E.S., Papaioannou M., Vougas K., Polyzos A., Myrianthopoulos V., et al.  
760 (2016) Exploring and exploiting the systemic effects of deregulated replication licensing.  
761 *Semin Cancer Biol.* **37-38**, 3-15.

762 Puig M., Casillas S., Villatoro S., Cáceres M. (2015) Human inversions and their functional  
763 consequences. *Brief Funct Genomics* **14**, 369-379.

764 Qian Y., Zhang J., Yan B., Chen X. (2008) DEC1, a basic helix-loop-helix transcription factor and a  
765 novel target gene of the p53 family, mediates p53-dependent premature senescence. *J. Biol.*  
766 *Chem.* **283**, 2896-2905.

767 Rada-Iglesias A., Grosveld F.G., Papantonis A. (2018) Forces driving the three-dimensional folding  
768 of eukaryotic genomes. *Mol. Syst. Biol.* **14**, e8214.

769 Ramirez R.D., Herbert B.S., Vaughan M.B., Zou Y., Gandia K., Morales C.P., et al. (2003) Bypass of  
770 telomere-dependent replicative senescence (M1) upon overexpression of Cdk4 in normal  
771 human epithelial cells. *Oncogene* **22**, 433-444.

772 Ramírez F., Bhardwaj V., Arrigoni L., Lam K.C., Grüning B.A., Villaveces J., et al. (2018) High-  
773 resolution TADs reveal DNA sequences underlying genome organization in flies. *Nat.*  
774 *Commun.* **9**, 189.

775 Rao S.S., Huntley M.H., Durand N.C., Stamenova E.K., Bochkov I.D., Robinson J.T., et al. (2014) A  
776 3D map of the human genome at kilobase resolution reveals principles of chromatin looping.  
777 *Cell* **159**, 1665-1680.

778 Risso D., Ngai J., Speed T. Dudoit S. (2014) Normalization of RNA-seq data using factor analysis of  
779 control genes or samples. *Nat. Biotechnol.* **32**, 896-902.

780 Rodier F., Campisi J. (2011) Four faces of cellular senescence. *J. Cell Biol.* **192**, 547-556.

781 Rouillard A.D., Gundersen G.W., Fernandez N.F., Wang Z., Monteiro C.D., McDermott M.G., et al.  
782 (2016) The harmonizome: a collection of processed datasets gathered to serve and mine  
783 knowledge about genes and proteins. *Database (Oxford)* *pii*, baw100.

784 Sato M., Vaughan M.B., Girard L., Peyton M., Lee W., Shames D.S., et al. (2006) Multiple  
785 oncogenic changes are not sufficient to confer a full malignant phenotype on human  
786 bronchial epithelial cells. *Cancer Res.* 66, 2116-2128.

787 Sato F., Bhawal U.K., Yoshimura T., Muragaki Y. (2016) DEC1 and DEC2 crosstalk between  
788 circadian rhythm and tumor progression. *J. Cancer* 7, 153-159.

789 Sideridou M., Zakopoulou R., Evangelou K., Liontos M., Kotsinas A., Rampakakis E., et al. (2011)  
790 Cdc6 expression represses E-cadherin transcription and activates adjacent replication origins.  
791 *J. Cell Biol.* 195, 1123-1140.

792 Sotiriou S., Kamileri I., Lugli N., Evangelou K., Da-Re C., Huber F., et al. (2016) Mammalian RAD52  
793 functions in break-induced replication repair of collapsed DNA replication forks. *Mol. Cell* 64,  
794 1127-1134.

795 Spadari S., Sala F., Pedrali-Noy Guido. (1982) Aphidicolin: a specific inhibitor of nuclear DNA  
796 replication in eukaryotes. *Trends Biochem. Sci.* 7, 29-32.

797 Stratton M.R., Campbell P.J., Futreal P.A. (2009) The cancer genome. *Nature* 458, 719-724.

798 Ritschka B., Storer M., Mas A., Heinzmann F., Ortells M.C., Morton J.P., et al. (2017). The  
799 senescence-associated secretory phenotype induces cellular plasticity and tissue  
800 regeneration. *Genes Dev.* 31, 172-183.

801 Thiery J.P., Acloque H., Huang R.Y., Nieto M.A. (2009) Epithelial-mesenchymal transitions in  
802 development and disease. *Cell* 139, 871-890.

803 Tsantoulis P.K., Kotsinas A., Sfrikakis P.P., Evangelou K., Sideridou M., Levy B., et al. (2008)  
804 Oncogene-induced replication stress preferentially targets common fragile sites in  
805 preneoplastic lesions: a genome-wide study. *Oncogene* 27, 3256-3264.

806 Van der Auwera G.A., Carneiro M., Hartl C., Poplin R., del Angel G., Levy-Moonshine A., et al.  
807 (2013) From fastQ data to high-confidence variant calls: the genome analysis toolkit best  
808 practices pipeline. *Curr. Protoc. Bioinformatics* 43, 1-33.

809 Vaziri C., Saxena S., Jeon Y., Lee C., Murata K., Machida Y., et al. (2003) A p53-dependent-  
810 checkpoint pathway prevents re-replication. *Mol. Cell* 11, 997-1008.

811 Wang K., Li M., Hakonarson H. (2010) ANNOVAR: functional annotation of genetic variants from  
812 high-throughput sequencing data. *Nucleic Acids Res.* 38, e164.

813 Wellenreuther M., Bernatchez L. (2018) Eco-evolutionary genomics of chromosomal inversions.  
814 *Trends Ecol. Evol.* 33, 427-440.

815 Wong D.J., Liu H., Ridky T.W., Cassarino D., Segal E., Chang H.Y. (2008) Module map of stem cell  
816 genes guides creation of epithelial cancer stem cells. *Cell Stem Cell* 10, 333-344.

817 Wood P.A., Yang X., Hrushesky W.J. (2009) Clock genes and cancer. *Integr Cancer Ther.* 8, 303-  
818 308.

819 Yamada K., Miyamoto K. (2005) Basic helix-loop-helix transcription factors, BHLHB2 and BHLHB3;  
820 their gene expressions are regulated by multiple extracellular stimuli. *Front. Biosci.* 10, 3151-  
821 3171.

822 Yan W.X., Mirzazadeh R., Garnerone S., Scott D., Schneider M.W., Kallas T., et al. (2017) BLISS is a  
823 versatile and quantitative method for genome-wide profiling of DNA double-strand breaks.  
824 *Nat. Commun.* 8, 15058.

825 Yu Y., Schleich K., Yue B., Ji S., Lohneis P., Kemper K., et al. (2018) Targeting the senescence-  
826 overriding cooperative activity of structurally unrelated H3K9 demethylases in melanoma.  
827 *Cancer Cell* 33, 785.

828 Zhang, Y., Liu, T., Meyer, C.A. et al. (2008) Model-based analysis of ChIP-Seq (MACS). *Genome*  
829 *Biol.* 9, R137.



830 Zhong Y., Nellimoottil T., Peace J.M., Knott S.R., Villwock S.K., Yee J.M., et al. (2013) The level of  
 831 origin firing inversely affects the rate of replication fork progression. *J. Cell Biol.* *201*, 373-383.  
 832 Zhu Y., Tchkonina T., Pirtskhalava T., Gower A., Ding H., Giorgadze N., et al. (2015). The Achilles'  
 833 heel of senescent cells: from transcriptome to senolytic drugs. *Aging Cell* *14*, 644-658.
